# Supplementary material for: Shared and Unique Evolutionary Trajectories to Ciprofloxacin Resistance in Gram-Negative Bacterial Pathogens
Source: PubMed Central journal article supplement (PMC8262867; doi:10.1128/mbio.00987-21), 2021-06-22

**Supplementary Figure S2.** OD profiles (black line) and calculated drug concentration profiles (red line) obtained in the course of experimental evolution of ciprofloxacin resistance in (A) *Escherichia coli* BW25113, CEC-2 run; (B) *Escherichia coli* BW25113, CEC-4 run; (C) *Acinetobacter baumannii* ATCC17978, CAB-1 run; (D) *Pseudomonas aeruginosa* ATCC27853, PAC-1 run; (E) *Pseudomonas aeruginosa* ATCC27853, PAC-2 run. The right axis shows CIP concentration (xMIC) as fold-change relative to MIC value of respective unevolved strains. Sequenced samples marked with arrows.

A

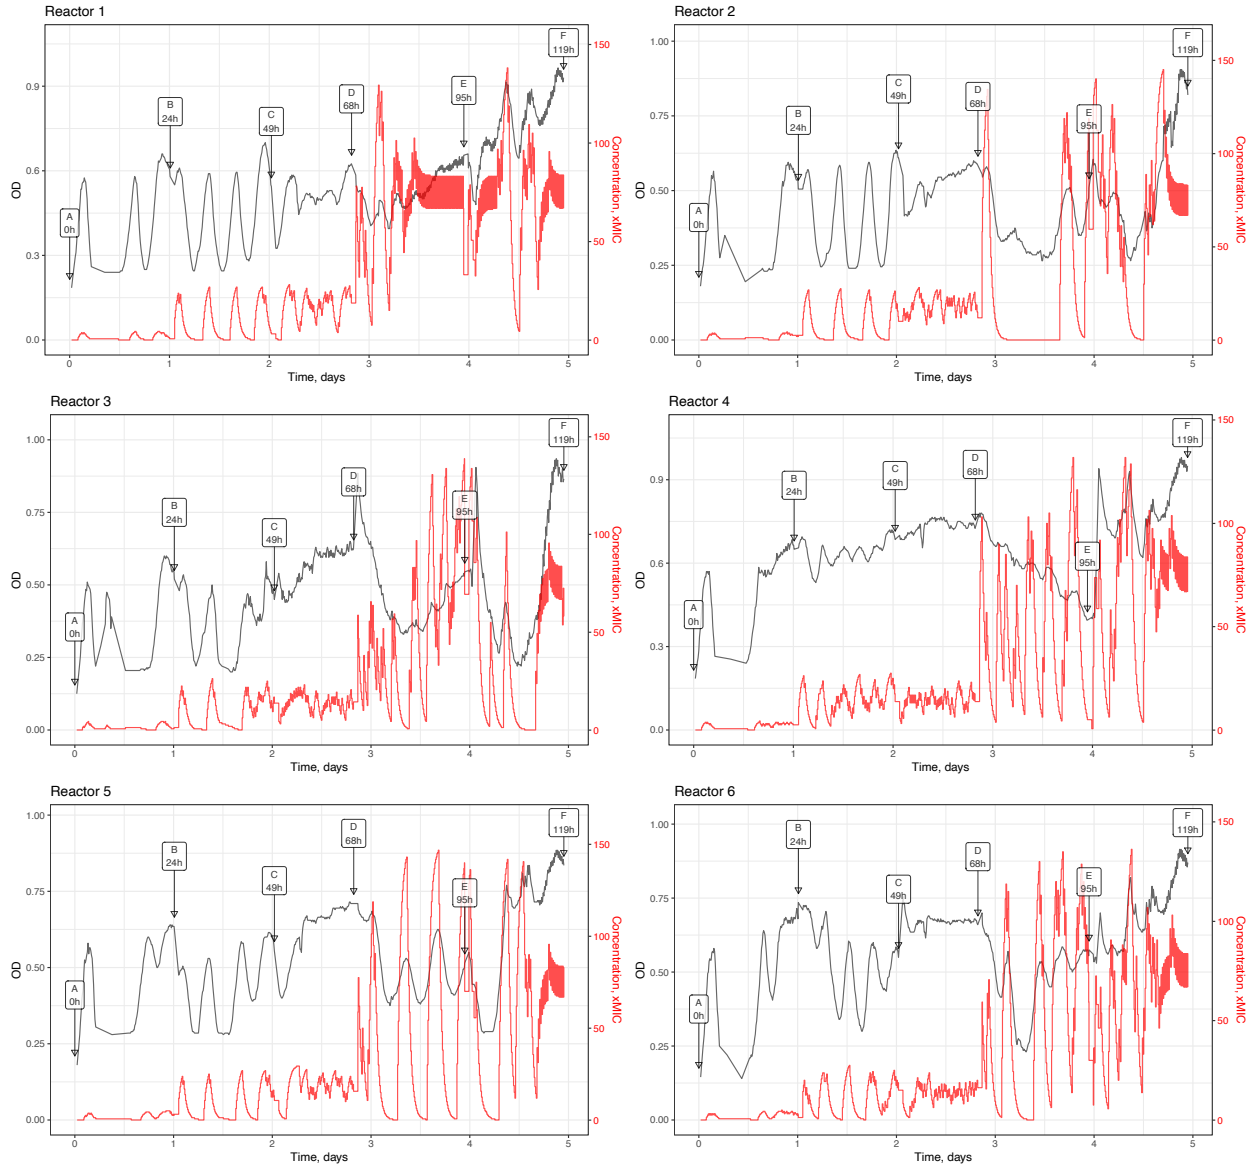

**B**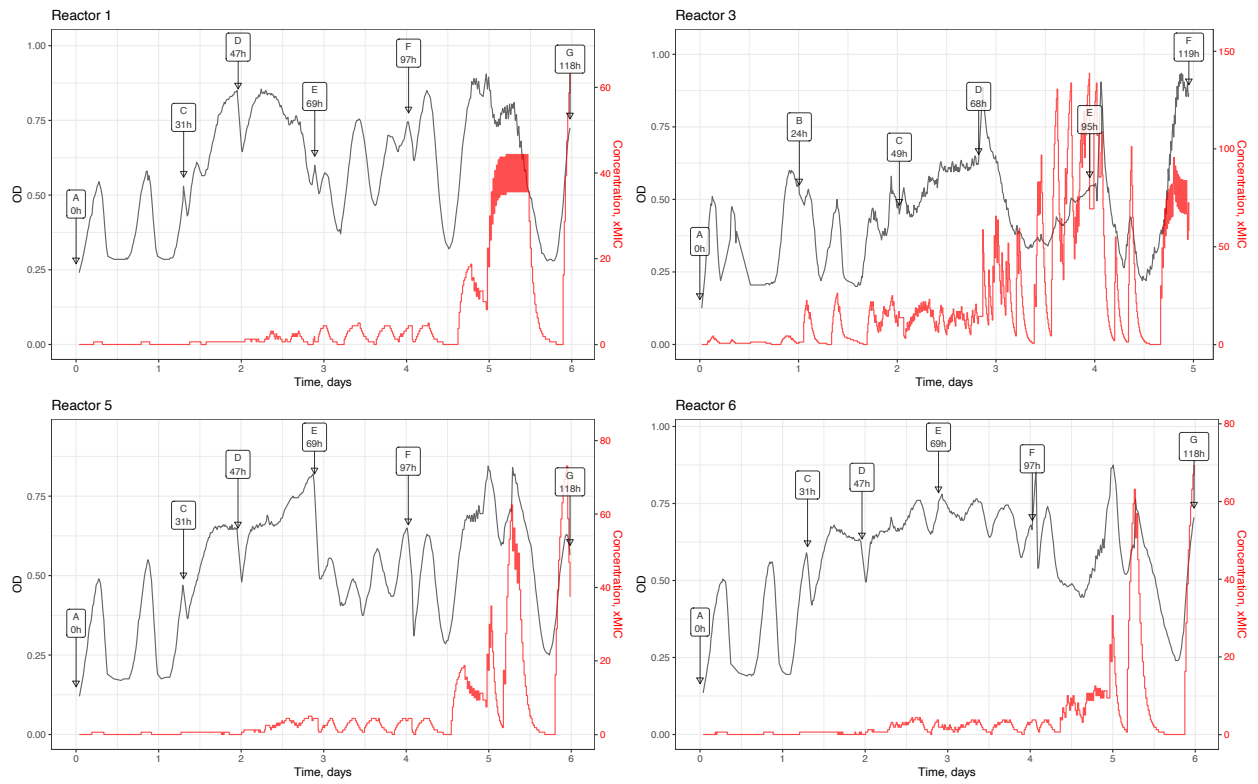

C

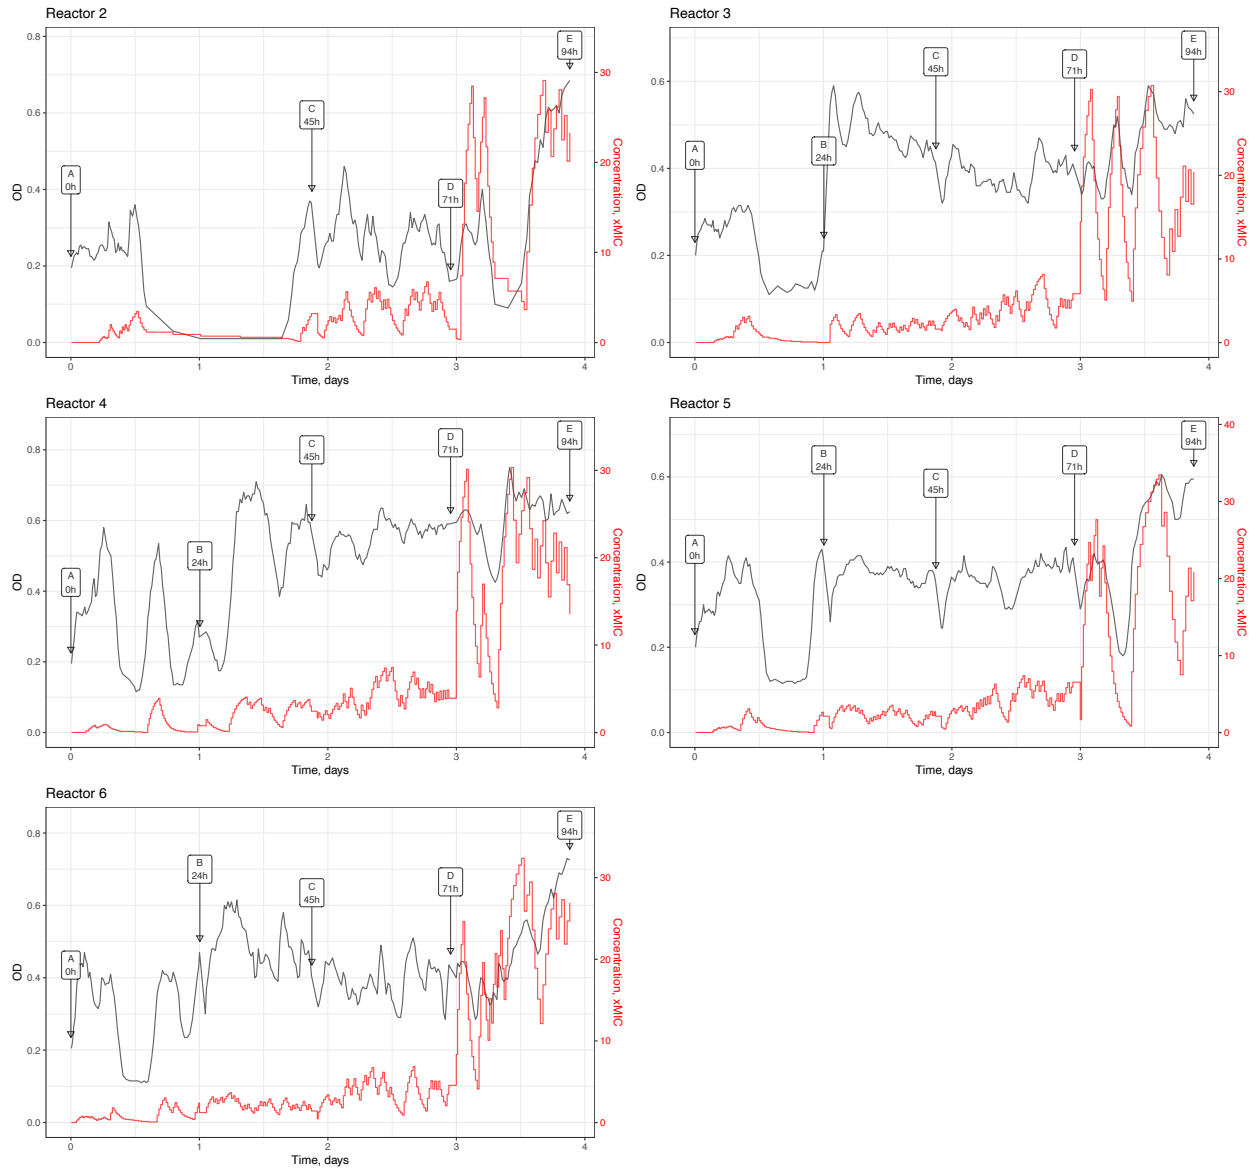

D

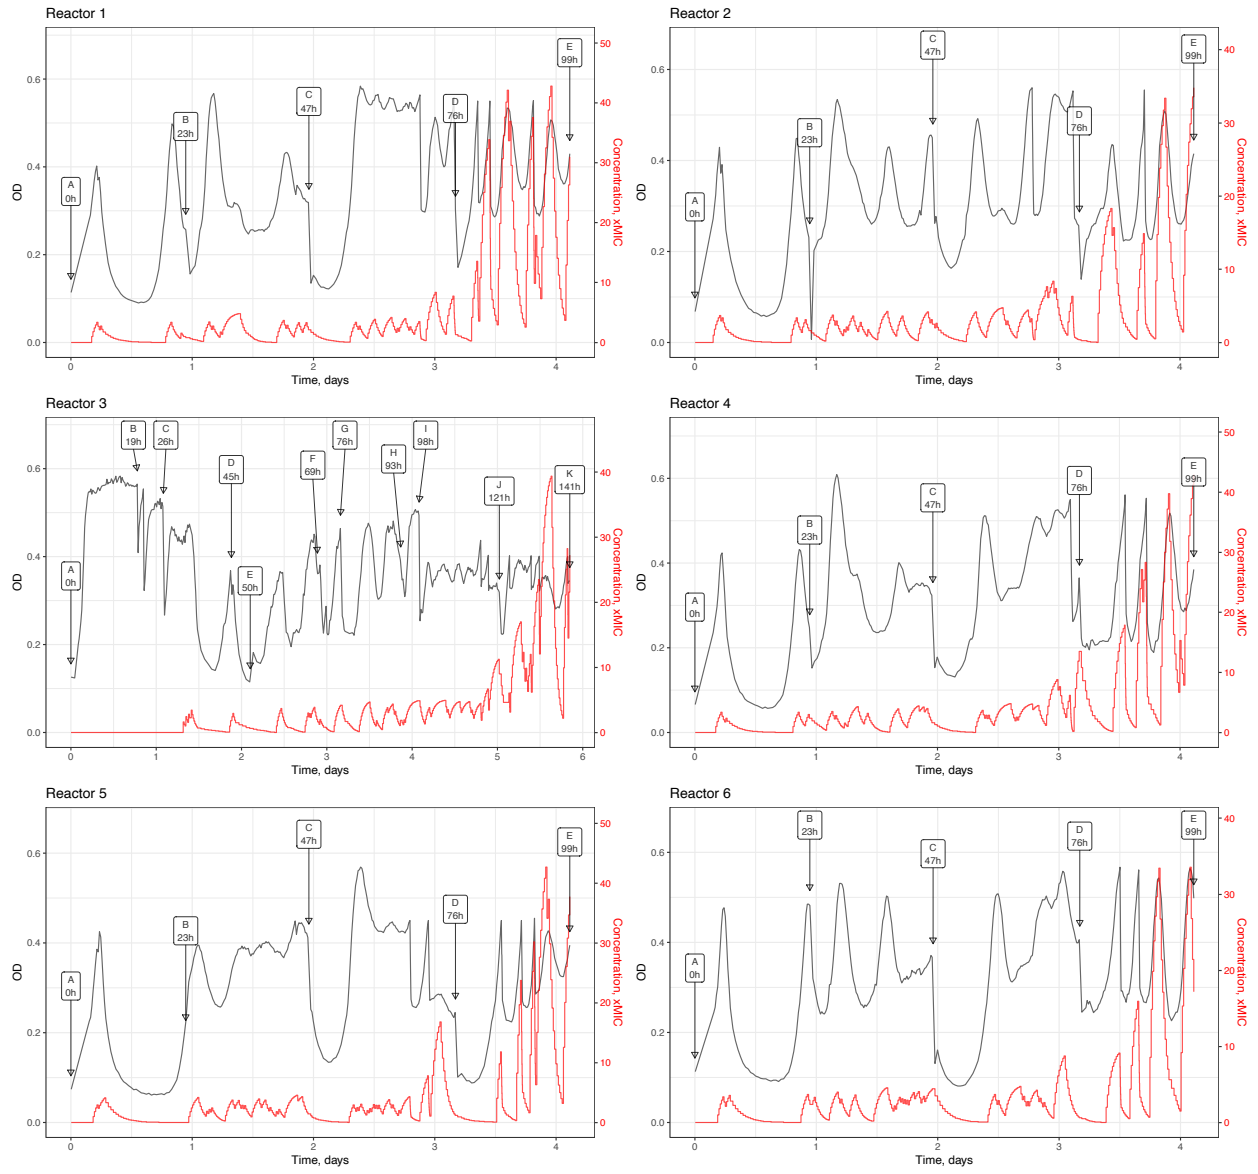

E

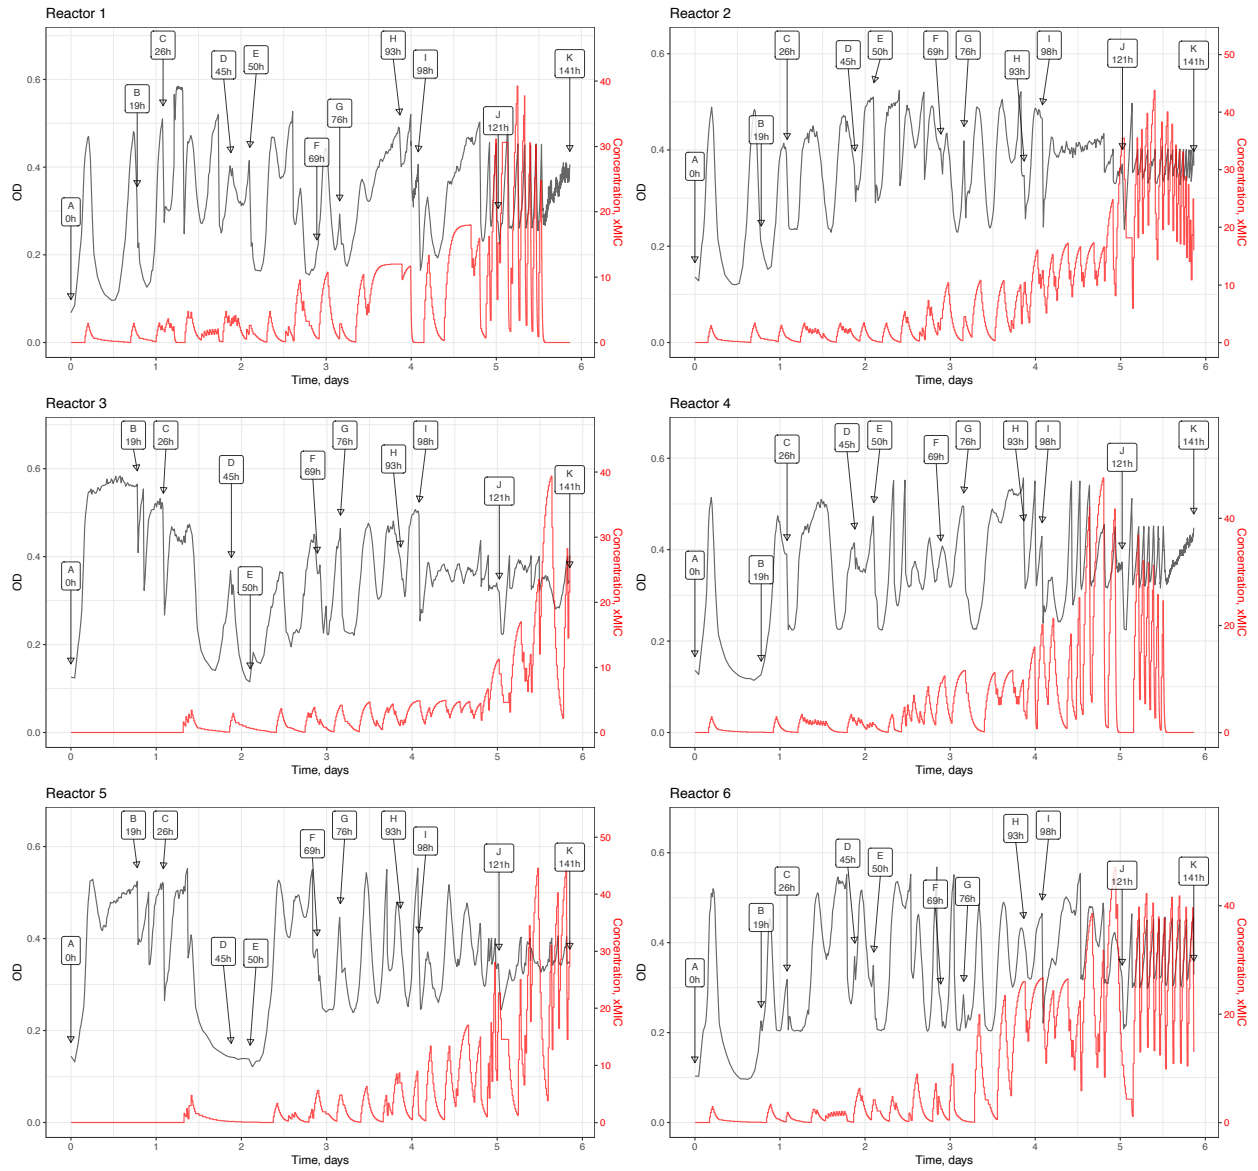

Supplement: mbio.00987-21-sf002.pdf [file mbio.00987-21-sf002.pdf]
