# Supplementary material for: Shared and Unique Evolutionary Trajectories to Ciprofloxacin Resistance in Gram-Negative Bacterial Pathogens
Source: PubMed Central journal article supplement (PMC8262867; doi:10.1128/mbio.00987-21), 2021-06-22

**Supplementary Figure 3. Computational pipeline for a primary analysis of population sequencing data.** Data shown in black hexagons. Processes and software shown in rectangles and rounded rectangles respectively. Frames indicate aims of the parts of the analysis.

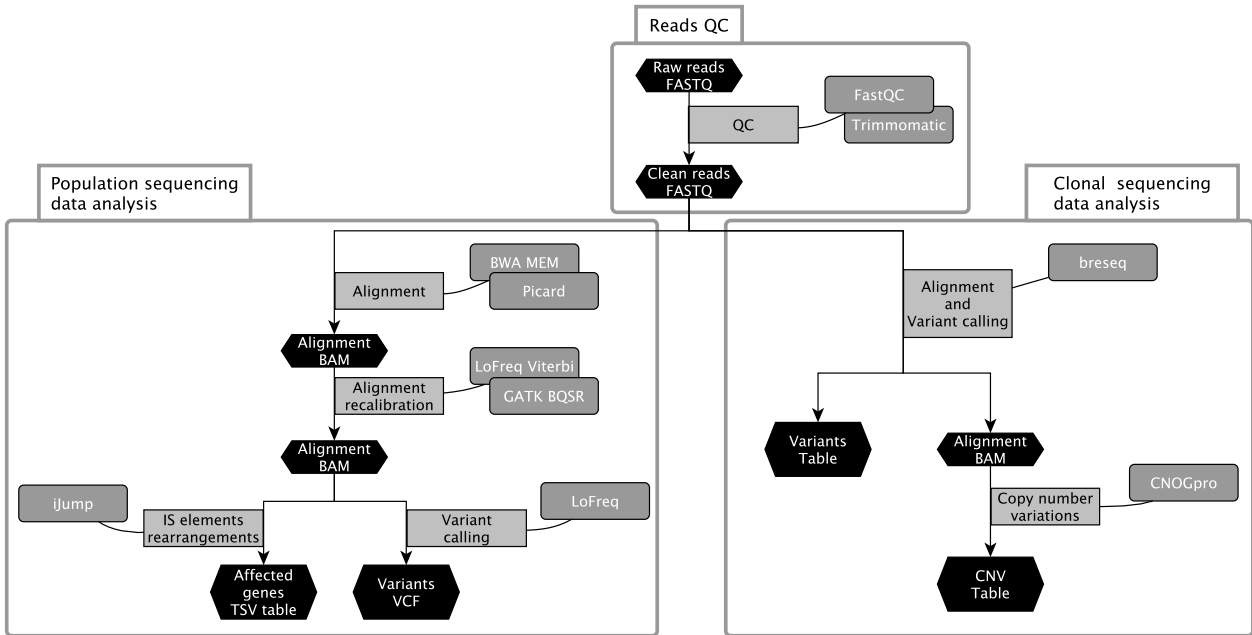

Supplement: mbio.00987-21-sf003.pdf [file mbio.00987-21-sf003.pdf]
