# Supplementary material for: Shared and Unique Evolutionary Trajectories to Ciprofloxacin Resistance in Gram-Negative Bacterial Pathogens
Source: PubMed Central journal article supplement (PMC8262867; doi:10.1128/mbio.00987-21), 2021-06-22

**Supplementary Figure S4.** Population dynamics of experimental evolution of ciprofloxacin resistance in (A) *Escherichia coli* BW25113, CEC-2 run; (B) *Escherichia coli* BW25113, CEC-4 run; (C) *Acinetobacter baumannii* ATCC17978, CAB-1 run; (D) *Pseudomonas aeruginosa* ATCC27853, PAC-1 run; (E) *Pseudomonas aeruginosa* ATCC27853, PAC-2 run. For each reactor in every morbidostat run, the frequency of major mutations (reaching  $\geq 5\%$ ) in evolving bacterial populations is shown as a function of time.

A

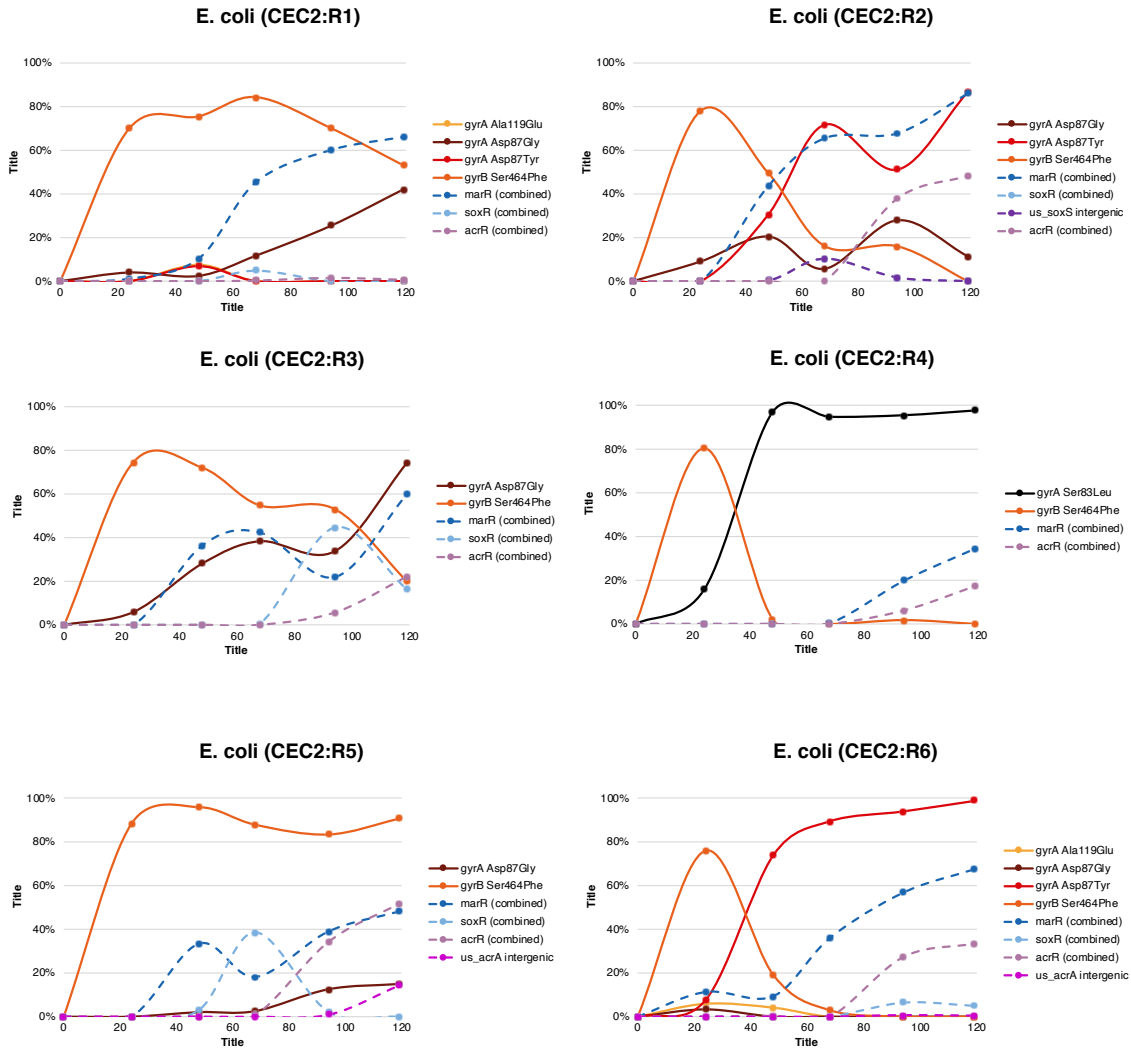

B

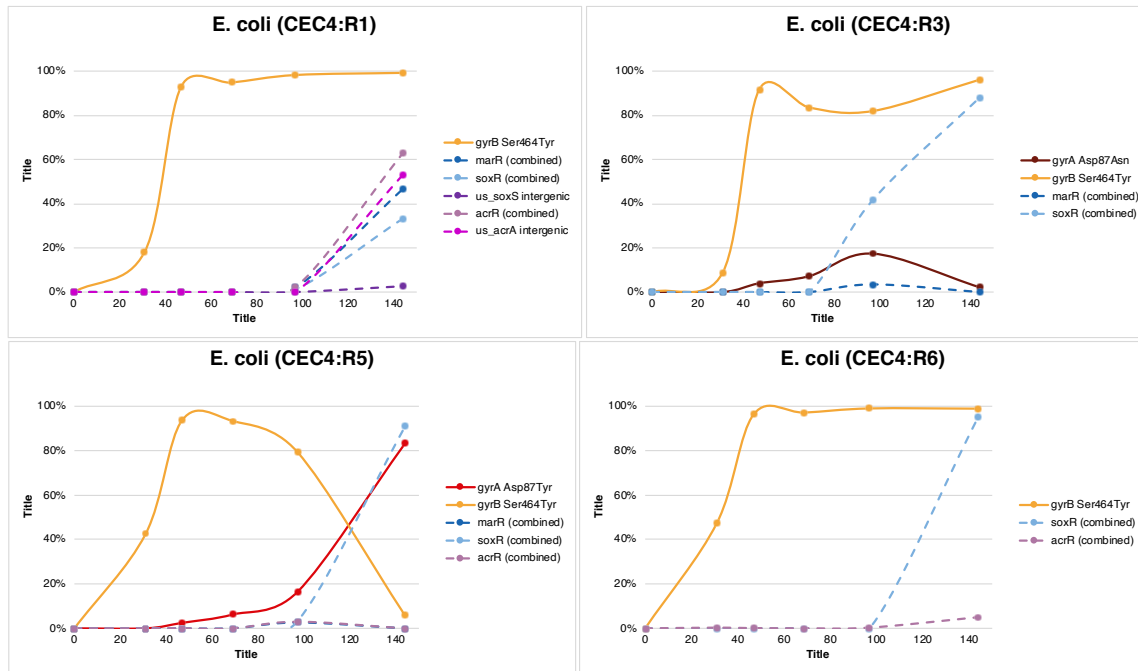

C

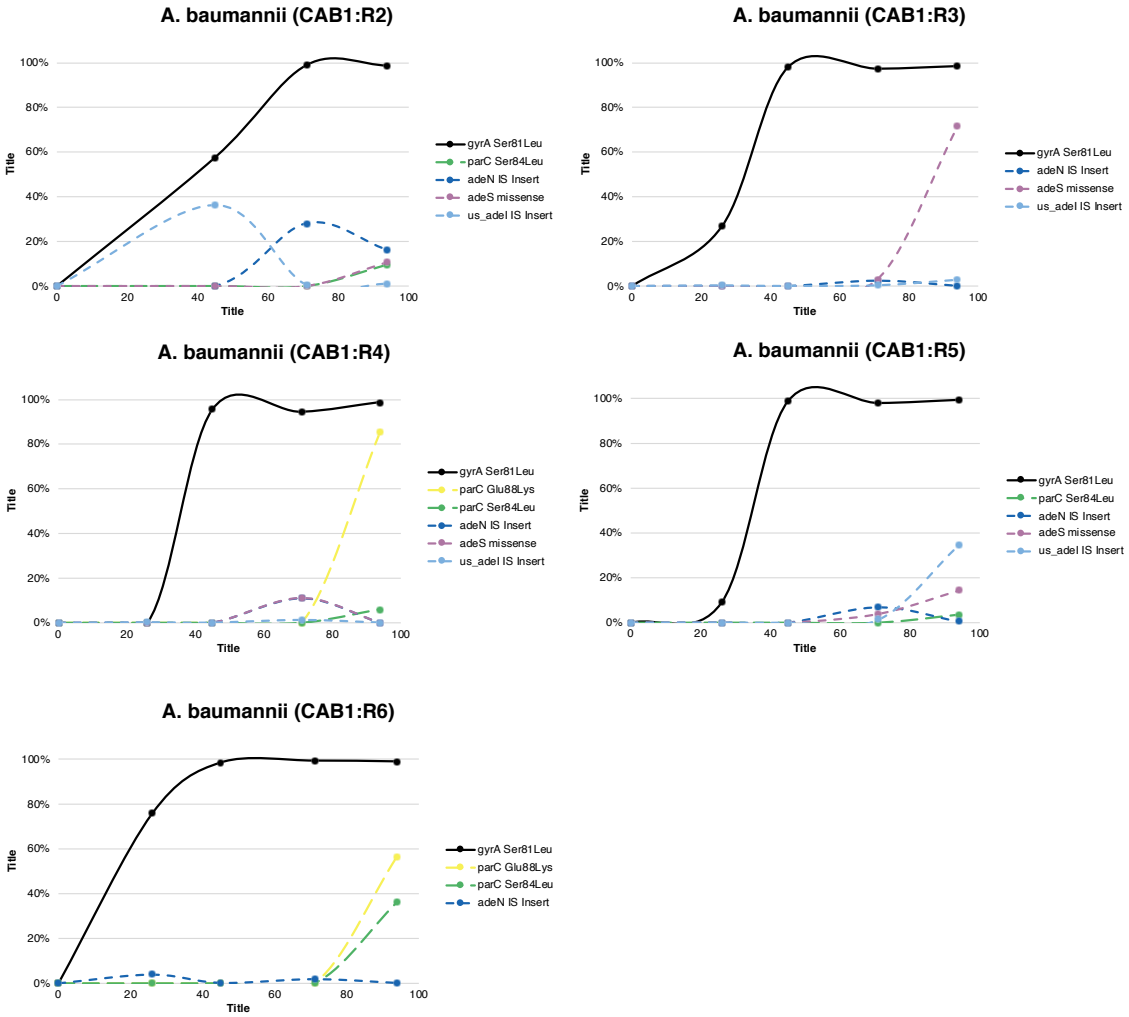

D

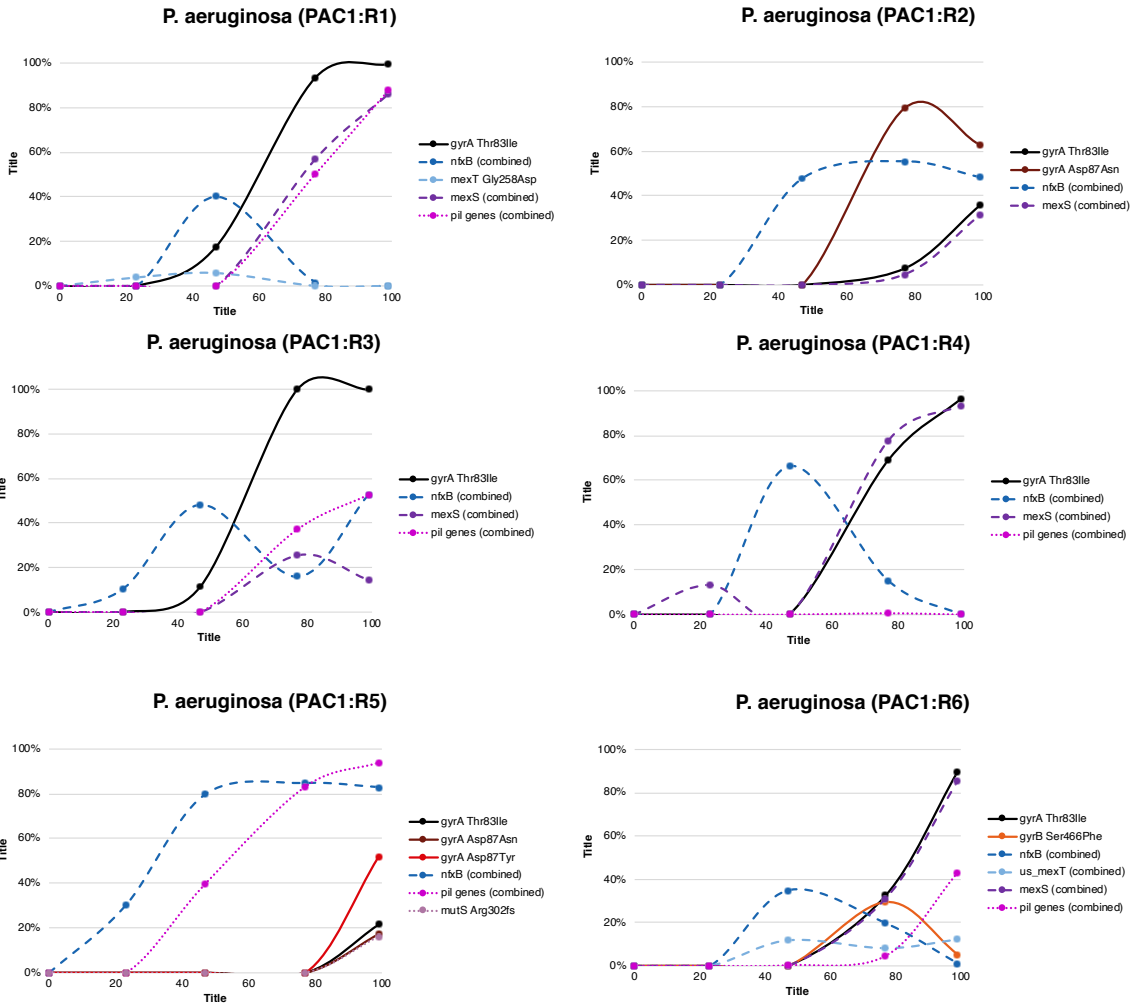

E

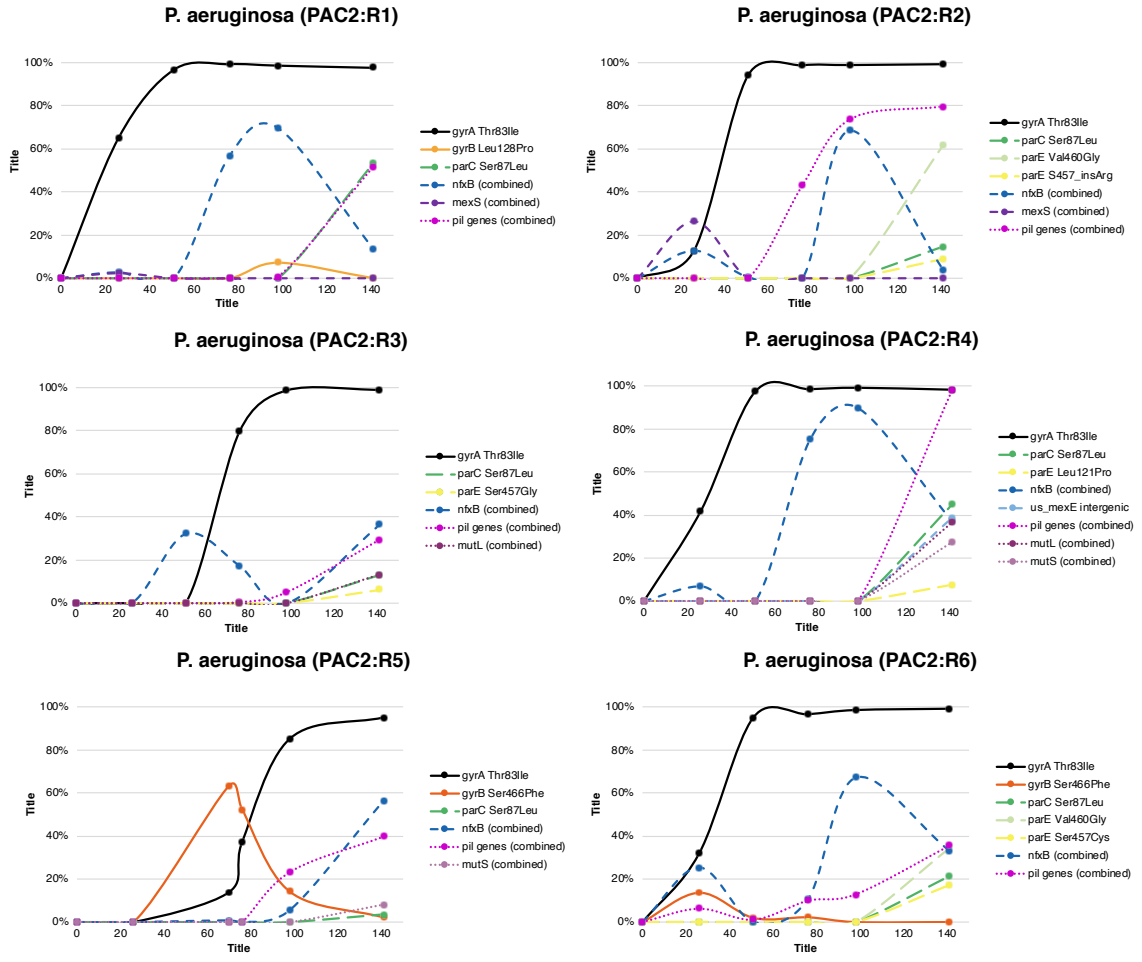

Supplement: mbio.00987-21-sf004.pdf [file mbio.00987-21-sf004.pdf]
